# Supplementary material for: Supplemental N‐3 Polyunsaturated Fatty Acids Limit A1‐Specific Astrocyte Polarization via Attenuating Mitochondrial Dysfunction in Ischemic Stroke in Mice
Source: Hindawi journal article supplement (doi:10.1155/2021/5524705), 2021-01-01
Supplement: f1 [file 5524705.f1.pdf]

## Supplementary Material

**Supplementary Table 2 Garcia scales for scoring the neurological scores**

| <b>Garcia scales</b>                      | <b>0 score</b>                                      | <b>1 score</b>                                       | <b>2 scores</b>                                                        | <b>3 scores</b>                                                    |
|-------------------------------------------|-----------------------------------------------------|------------------------------------------------------|------------------------------------------------------------------------|--------------------------------------------------------------------|
| <b>Spontaneous activity</b>               | Does not move at all                                | Barely moves in cage                                 | Moved around reluctantly, reaches at least one side of cage            | Moved around, explored cage                                        |
| <b>Symmetry in movement of four limbs</b> | Forelimb on contralateral side does not move at all | Limbs on contralateral side exhibit minimal movement | Limbs on contralateral side extend less than those on ipsilateral side | All four limbs extend symmetrically                                |
| <b>Forepaw outstretching</b>              | Left forelimb does not move at all                  | Left forelimb has limited movement                   | Left side outstretched less than left, forepaw walking impaired        | Forelimbs outstretched, walking symmetrically on forepaws          |
| <b>Climbing</b>                           |                                                     | Does not climb                                       | Left side impaired, does not grip as tightly and releases before right | Climbs, grips tightly with both forepaws                           |
| <b>Body proprioception</b>                |                                                     | Does not react to stimulus on left side              | Reacts slowly to stimulus on left side                                 | Reacts by turning head, equally startled by stimulus on both sides |
| <b>Vibrissae touch</b>                    |                                                     | Does not react to stimulus on left side              | Reacts slowly to stimulus on left side                                 | Reacts by turning head, equally startled by stimulus on both sides |

**Supplementary Table 1** Primers sequences used in current study

| <b>Genes</b> | <b>Sequence</b>         | <b>Description</b>             |
|--------------|-------------------------|--------------------------------|
| Amigo2-F     | GAGGCGACCATAATGTCGTT    | Genes of A1-specific astrocyte |
| Amigo2-R     | GCATCCAACAGTCCGATTCT    |                                |
| H2-D1-F      | TCCGAGATTGTAAAGCGTGAAGA |                                |
| H2-D1-R      | ACAGGGCAGTGCAGGGATAG    |                                |
| H2-T23-F     | GGACCGCGAATGACATAGC     |                                |
| H2-T23-R     | GCACCTCAGGGTGACTTCAT    |                                |
| Serping1-F   | ACAGCCCCCTCTGAATTCTT    |                                |
| Serping1-R   | GGATGCTCTCCAAGTTGCTC    |                                |
| Ugt1a-F      | CCTATGGGTCACTTGCCACT    |                                |
| Ugt1a-R      | AAAACCATGTTGGGCATGAT    |                                |
| B3gnt5-F     | CGTGGGGCAATGAGAACTAT    | Genes of A2-specific astrocyte |
| B3gnt5-R     | CCCAGCTGAACTGAAGAAGG    |                                |
| Cd14-F       | GGACTGATCTCAGCCCTCTG    |                                |
| Cd14-R       | GCTTCAGCCCAGTGAAAGAC    |                                |
| Emp1-F       | GAGACACTGGCCAGAAAAGC    |                                |
| Emp1-R       | TAAAAGGCAAGGGAATGCAC    |                                |
| Slc10a6-F    | GCTTCGGTGGTATGATGCTT    |                                |
| Slc10a6-R    | CCACAGGCTTTTCTGGTGAT    |                                |
